# Supplementary material for: Trace elements determination in seawater by ICP-MS with on-line pre-concentration on a Chelex-100 column using a ‘standard’ instrument setup
Source: PubMed Central journal article supplement (PMC4522618; doi:10.1016/j.mex.2015.06.003), 2015-06-18
Supplement: mmc1.pdf [file mmc1.pdf]

*Supplementary data*

**Trace elements determination in seawater by ICP-MS with on-line pre-concentration on a Chelex-100 micro-column using a ‘standard’ instrument setup.**

**Jens Søndergaard<sup>\*</sup>, Gert Asmund, Martin M. Larsen**

**\*corresponding author:**

**Department of Bioscience, Aarhus University, Frederiksborgvej 399, DK-4000 Roskilde,  
Denmark**

**Phone: +45 87 15 87 15**

**E-mail: [js@bios.au.dk](mailto:js@bios.au.dk)**

**Table of contents:**

Page 2: BIOS's participation in QUASIMEME, Round 55 for seawater analysis.

Page 3: BIOS's participation in QUASIMEME, Round 57 for seawater analysis.

Page 4: BIOS's participation in QUASIMEME, Round 59 for seawater analysis.

Page 5: BIOS's participation in QUASIMEME, Round 61 for seawater analysis.

Page 6: BIOS's participation in QUASIMEME, Round 63 for seawater analysis.

Page 7: BIOS's participation in QUASIMEME, Round 65 for seawater analysis.

05 February 2009

## Quasimeme Database

Q104D NERI

Dr Gert Asmund

Denmark

Exercise 819 – R55 Metals in Seawater: Oct 2008 – Jan 2009

| Matrix   | Determinand | Mean  | Units | Assigned Value | Total Error | Z Score | z | Total Dupl. |
|----------|-------------|-------|-------|----------------|-------------|---------|---|-------------|
| QTM133SW | Cadmium     | 0.017 | µg/l  | 0.017          | 0.005       | 0.0     | S | 1           |
| QTM133SW | Cobalt      | 0.024 | µg/l  |                |             |         | B | 1           |
| QTM133SW | Copper      | 32.71 | µg/l  | 32.80          | 4.199       | 0.0     | S | 1           |
| QTM133SW | Iron        | 2.697 | µg/l  |                |             |         | B | 1           |
| QTM133SW | Lead        | 0.800 | µg/l  | 0.894          | 0.117       | -0.8    | S | 1           |
| QTM133SW | Manganese   | 0.225 | µg/l  | 0.272          | 0.234       | -0.2    | S | 1           |
| QTM133SW | Nickel      | 0.489 | µg/l  | 0.376          | 0.147       | 0.8     | S | 1           |
| QTM133SW | Vanadium    | 1.380 | µg/l  | 1.735          | 0.317       | -1.1    | S | 1           |
| QTM133SW | Zinc        | 9.110 | µg/l  | 10.80          | 1.550       | -1.1    | S | 1           |
| QTM134SW | Cadmium     | 0.194 | µg/l  | 0.210          | 0.029       | -0.6    | S | 1           |
| QTM134SW | Cobalt      | 0.082 | µg/l  |                |             |         | B | 1           |
| QTM134SW | Copper      | 34.38 | µg/l  | 34.89          | 4.462       | -0.1    | S | 1           |
| QTM134SW | Iron        | 1.522 | µg/l  | 1.462          | 0.383       | 0.2     | S | 1           |
| QTM134SW | Lead        | 1.186 | µg/l  | 1.330          | 0.171       | -0.8    | S | 1           |
| QTM134SW | Manganese   | 0.282 | µg/l  | 0.361          | 0.245       | -0.3    | S | 1           |
| QTM134SW | Nickel      | 0.632 | µg/l  | 0.596          | 0.175       | 0.2     | S | 1           |
| QTM134SW | Vanadium    | 1.611 | µg/l  | 2.050          | 0.356       | -1.2    | S | 1           |
| QTM134SW | Zinc        | 9.235 | µg/l  | 10.90          | 1.562       | -1.1    | S | 1           |
| QTM135SW | Cadmium     | 0.787 | µg/l  | 0.619          | 0.080       | 2.1     | Q | 1           |
| QTM135SW | Cobalt      | 0.916 | µg/l  | 0.910          | 0.214       | 0.0     | S | 1           |
| QTM135SW | Copper      | 12.10 | µg/l  | 12.49          | 1.662       | -0.2    | S | 1           |
| QTM135SW | Iron        | 1.446 | µg/l  | 1.356          | 0.370       | 0.2     | S | 1           |
| QTM135SW | Lead        | 0.743 | µg/l  | 0.877          | 0.115       | -1.2    | S | 1           |
| QTM135SW | Manganese   | 0.828 | µg/l  | 0.628          | 0.278       | 0.7     | S | 1           |
| QTM135SW | Nickel      | 1.568 | µg/l  | 1.518          | 0.290       | 0.2     | S | 1           |
| QTM135SW | Vanadium    | 1.056 | µg/l  | 1.314          | 0.264       | -1.0    | S | 1           |
| QTM135SW | Zinc        | 3.835 | µg/l  | 4.611          | 0.776       | -1.0    | S | 1           |

The letters in the z column indicate: S – Satisfactory, Q – Questionable,  
U – Unsatisfactory, C – Consistent, I – Inconsistent, B - Blanc.

*If the analytical value looks like this, then the Assigned value is indicative only.*

01 October 2009

## Quasimeme Database

Q104D NERI

Dr Gert Asmund

Denmark

Exercise 837 – R57 Metals in Seawater: Apr – Jul 2009

| Matrix   | Determinand | Mean   | Units | Assigned Value | Total Error | Z Score | z | Total Dupl. |
|----------|-------------|--------|-------|----------------|-------------|---------|---|-------------|
| QTM139SW | Arsenic     | 2.086  | µg/l  | 1.235          | 0.404       | 2.1     | Q | 1           |
| QTM139SW | Cadmium     | <0.031 | µg/l  | 0.015          | 0.004       |         | C | 1           |
| QTM139SW | Cobalt      | 0.206  | µg/l  |                |             |         | B | 1           |
| QTM139SW | Copper      | 1.574  | µg/l  | 2.013          | 0.352       | -1.2    | S | 1           |
| QTM139SW | Lead        | 0.159  | µg/l  | 0.191          | 0.029       | -1.1    | S | 1           |
| QTM139SW | Manganese   | <0.033 | µg/l  |                |             |         | B | 1           |
| QTM139SW | Nickel      | 0.980  | µg/l  | 0.961          | 0.220       | 0.1     | S | 1           |
| QTM139SW | Silver      | <0.012 | µg/l  |                |             |         | B | 1           |
| QTM139SW | Tin         | <1.050 | µg/l  |                |             |         | B | 1           |
| QTM139SW | Vanadium    | 1.034  | µg/l  | 1.222          | 0.253       | -0.7    | S | 1           |
| QTM139SW | Zinc        | 1.476  | µg/l  | 1.430          | 0.379       | 0.1     | S | 1           |
| QTM140SW | Arsenic     | 3.441  | µg/l  | 2.829          | 0.604       | 1.0     | S | 1           |
| QTM140SW | Cadmium     | 0.306  | µg/l  | 0.377          | 0.050       | -1.4    | S | 1           |
| QTM140SW | Cobalt      | 0.349  | µg/l  | 0.161          | 0.120       | 1.6     | S | 1           |
| QTM140SW | Copper      | 2.245  | µg/l  | 2.916          | 0.465       | -1.4    | S | 1           |
| QTM140SW | Lead        | 0.595  | µg/l  | 0.635          | 0.084       | -0.5    | S | 1           |
| QTM140SW | Manganese   | 0.968  | µg/l  | 1.477          | 0.385       | -1.3    | S | 1           |
| QTM140SW | Nickel      | 1.743  | µg/l  | 1.774          | 0.322       | -0.1    | S | 1           |
| QTM140SW | Silver      | 0.147  | µg/l  | 0.224          | 0.128       | -0.6    | S | 1           |
| QTM140SW | Tin         | <1.050 | µg/l  |                |             |         | B | 1           |
| QTM140SW | Vanadium    | 2.078  | µg/l  | 2.444          | 0.406       | -0.9    | S | 1           |
| QTM140SW | Zinc        | 7.513  | µg/l  | 7.835          | 1.179       | -0.3    | S | 1           |
| QTM141SW | Arsenic     | 3.232  | µg/l  | 2.800          | 0.600       | 0.7     | S | 1           |
| QTM141SW | Cadmium     | 0.914  | µg/l  | 0.883          | 0.113       | 0.3     | S | 1           |
| QTM141SW | Cobalt      | 1.478  | µg/l  | 1.353          | 0.269       | 0.5     | S | 1           |
| QTM141SW | Copper      | 1.842  | µg/l  | 2.157          | 0.370       | -0.9    | S | 1           |
| QTM141SW | Lead        | 0.363  | µg/l  | 0.398          | 0.055       | -0.6    | S | 1           |
| QTM141SW | Manganese   | 0.762  | µg/l  | 0.739          | 0.292       | 0.1     | S | 1           |
| QTM141SW | Nickel      | 0.721  | µg/l  | 0.682          | 0.185       | 0.2     | S | 1           |
| QTM141SW | Silver      | 0.914  | µg/l  | 0.687          | 0.186       | 1.2     | S | 1           |
| QTM141SW | Tin         | <1.050 | µg/l  |                |             |         | B | 1           |
| QTM141SW | Vanadium    | 0.971  | µg/l  | 1.053          | 0.232       | -0.4    | S | 1           |
| QTM141SW | Zinc        | 3.483  | µg/l  | 3.692          | 0.662       | -0.3    | S | 1           |

11 February 2010

## Quasimeme Database

Q104D NERI  
Dr Gert Asmund  
Denmark

Exercise 864 – R59 Metals in Seawater: Oct 2009 – Jan 2010

| Matrix   | Determinand | Mean   | Units | Assigned Value | Total Error | Z Score | z | Total Dupl. |
|----------|-------------|--------|-------|----------------|-------------|---------|---|-------------|
| QTM145SW | Cadmium     | <0.080 | µg/l  | 0.013          | 0.004       |         | I | 1           |
| QTM145SW | Cobalt      | <0.010 | µg/l  |                |             |         | B | 1           |
| QTM145SW | Copper      | 9.131  | µg/l  | 9.401          | 1.275       | -0.2    | S | 1           |
| QTM145SW | Lead        | 0.257  | µg/l  | 0.266          | 0.083       | -0.1    | S | 1           |
| QTM145SW | Manganese   | 0.229  | µg/l  | 0.337          | 0.242       | -0.4    | S | 1           |
| QTM145SW | Nickel      | 0.282  | µg/l  | 0.322          | 0.140       | -0.3    | S | 1           |
| QTM145SW | Silver      | <0.358 | µg/l  |                |             |         | B | 1           |
| QTM145SW | Vanadium    | 1.546  | µg/l  | 1.668          | 0.308       | -0.4    | S | 1           |
| QTM145SW | Zinc        | 12.94  | µg/l  | 12.47          | 1.759       | 0.3     | S | 1           |
| QTM146SW | Cadmium     | 0.230  | µg/l  | 0.297          | 0.040       | -1.7    | S | 1           |
| QTM146SW | Cobalt      | 0.134  | µg/l  | 0.132          | 0.116       | 0.0     | S | 1           |
| QTM146SW | Copper      | 5.266  | µg/l  | 5.695          | 0.812       | -0.5    | S | 1           |
| QTM146SW | Lead        | 0.551  | µg/l  | 0.576          | 0.122       | -0.2    | S | 1           |
| QTM146SW | Manganese   | 0.883  | µg/l  | 1.062          | 0.333       | -0.5    | S | 1           |
| QTM146SW | Nickel      | 1.211  | µg/l  | 1.410          | 0.276       | -0.7    | S | 1           |
| QTM146SW | Silver      | <0.358 | µg/l  |                |             |         | B | 1           |
| QTM146SW | Vanadium    | 2.344  | µg/l  | 2.431          | 0.404       | -0.2    | S | 1           |
| QTM146SW | Zinc        | 11.41  | µg/l  | 10.75          | 1.543       | 0.4     | S | 1           |
| QTM147SW | Cadmium     | 0.883  | µg/l  | 0.852          | 0.109       | 0.3     | S | 1           |
| QTM147SW | Cobalt      | 1.230  | µg/l  | 1.277          | 0.260       | -0.2    | S | 1           |
| QTM147SW | Copper      | 3.492  | µg/l  | 3.918          | 0.590       | -0.7    | S | 1           |
| QTM147SW | Lead        | 0.497  | µg/l  | 0.563          | 0.120       | -0.6    | S | 1           |
| QTM147SW | Manganese   | 0.827  | µg/l  | 0.814          | 0.302       | 0.0     | S | 1           |
| QTM147SW | Nickel      | 0.508  | µg/l  | 0.623          | 0.178       | -0.6    | S | 1           |
| QTM147SW | Silver      | 0.545  | µg/l  | 0.508          | 0.163       | 0.2     | S | 1           |
| QTM147SW | Vanadium    | 1.046  | µg/l  | 1.035          | 0.229       | 0.0     | S | 1           |
| QTM147SW | Zinc        | 4.842  | µg/l  | 4.927          | 0.816       | -0.1    | S | 1           |

The letters in the z column indicate: S – Satisfactory, Q – Questionable,

U – Unsatisfactory, C – Consistent, I – Inconsistent, B - Blanc.

*If the analytical value looks like this, then the Assigned value is indicative only.*

22 September 2010

## Quasimeme Database

Q104D NERI  
Dr Gert Asmund  
Denmark

Exercise 882 – R61 Metals in Seawater: Apr – Sep 2010

| Matrix   | Determinand | Mean  | Units | Assigned Value | Total Error | Z Score | z | Total Dupl. |
|----------|-------------|-------|-------|----------------|-------------|---------|---|-------------|
| QTM151SW | Cadmium     | 0.018 | µg/l  | 0.016          | 0.004       | 0.4     | S | 1           |
| QTM151SW | Cobalt      | 0.011 | µg/l  |                |             |         | B | 1           |
| QTM151SW | Copper      | 2.880 | µg/l  | 2.794          | 0.449       | 0.2     | S | 1           |
| QTM151SW | Lead        | 0.147 | µg/l  | 0.134          | 0.022       | 0.6     | S | 1           |
| QTM151SW | Manganese   | 0.160 | µg/l  | 0.236          | 0.230       | -0.3    | S | 1           |
| QTM151SW | Nickel      | 0.319 | µg/l  | 0.351          | 0.144       | -0.2    | S | 1           |
| QTM151SW | Vanadium    | 1.640 | µg/l  | 1.622          | 0.303       | 0.1     | S | 1           |
| QTM151SW | Zinc        | 8.960 | µg/l  | 9.590          | 1.399       | -0.5    | S | 1           |
| QTM152SW | Cadmium     | 0.600 | µg/l  | 0.559          | 0.072       | 0.6     | S | 1           |
| QTM152SW | Cobalt      | 0.255 | µg/l  | 0.239          | 0.130       | 0.1     | S | 1           |
| QTM152SW | Copper      | 4.710 | µg/l  | 4.348          | 0.644       | 0.6     | S | 1           |
| QTM152SW | Lead        | 1.170 | µg/l  | 1.022          | 0.133       | 1.1     | S | 1           |
| QTM152SW | Manganese   | 2.300 | µg/l  | 2.181          | 0.473       | 0.3     | S | 1           |
| QTM152SW | Nickel      | 2.160 | µg/l  | 2.230          | 0.379       | -0.2    | S | 1           |
| QTM152SW | Vanadium    | 3.150 | µg/l  | 2.927          | 0.466       | 0.5     | S | 1           |
| QTM152SW | Zinc        | 11.70 | µg/l  | 11.77          | 1.672       | 0.0     | S | 1           |
| QTM153SW | Cadmium     | 1.240 | µg/l  | 1.133          | 0.144       | 0.7     | S | 1           |
| QTM153SW | Cobalt      | 1.600 | µg/l  | 1.549          | 0.294       | 0.2     | S | 1           |
| QTM153SW | Copper      | 4.170 | µg/l  | 3.804          | 0.576       | 0.6     | S | 1           |
| QTM153SW | Lead        | 0.957 | µg/l  | 0.829          | 0.109       | 1.2     | S | 1           |
| QTM153SW | Manganese   | 1.640 | µg/l  | 1.579          | 0.397       | 0.2     | S | 1           |
| QTM153SW | Nickel      | 1.280 | µg/l  | 1.319          | 0.265       | -0.1    | S | 1           |
| QTM153SW | Vanadium    | 1.950 | µg/l  | 1.882          | 0.335       | 0.2     | S | 1           |
| QTM153SW | Zinc        | 7.110 | µg/l  | 6.960          | 1.070       | 0.1     | S | 1           |

The letters in the z column indicate: S – Satisfactory, Q – Questionable,

U – Unsatisfactory, C – Consistent, I – Inconsistent, B - Blanc.

*If the analytical value looks like this, then the Assigned value is indicative only.*

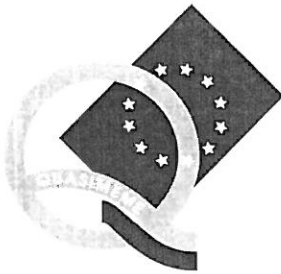

14 February 2011

## Quasimeme Database

Q104D NERI  
 Dr Gert Asmund  
 Denmark

Exercise 906 – R63 Metals in Seawater: Oct 2010 – Jan 2011

| Matrix   | Determinand | Mean   | Units | Assigned Value | Total Error | Z Score | z | Total Dupl. |
|----------|-------------|--------|-------|----------------|-------------|---------|---|-------------|
| QTM157SW | Arsenic     | 1.332  | µg/l  | 1.274          | 0.409       | 0.1     | S | 1           |
| QTM157SW | Cadmium     | <0.013 | µg/l  | 0.011          | 0.004       |         | C | 1           |
| QTM157SW | Cobalt      | 0.011  | µg/l  |                |             |         | B | 1           |
| QTM157SW | Copper      | 3.630  | µg/l  | 3.671          | 0.559       | -0.1    | S | 1           |
| QTM157SW | Manganese   | 0.274  | µg/l  | 0.305          | 0.238       | -0.1    | S | 1           |
| QTM157SW | Vanadium    | 1.462  | µg/l  | 1.564          | 0.295       | -0.3    | S | 1           |
| QTM158SW | Arsenic     | 4.498  | µg/l  | 3.716          | 0.715       | 1.1     | S | 1           |
| QTM158SW | Cadmium     | 0.694  | µg/l  | 0.722          | 0.093       | -0.3    | S | 1           |
| QTM158SW | Cobalt      | 0.389  | µg/l  | 0.403          | 0.150       | -0.1    | S | 1           |
| QTM158SW | Copper      | 4.898  | µg/l  | 5.027          | 0.728       | -0.2    | S | 1           |
| QTM158SW | Lead        | 0.936  | µg/l  | 0.946          | 0.123       | -0.1    | S | 1           |
| QTM158SW | Manganese   | 2.192  | µg/l  | 2.403          | 0.500       | -0.4    | S | 1           |
| QTM158SW | Vanadium    | 2.746  | µg/l  | 2.892          | 0.462       | -0.3    | S | 1           |
| QTM159SW | Arsenic     | 4.969  | µg/l  | 3.997          | 0.750       | 1.3     | S | 1           |
| QTM159SW | Cadmium     | 1.064  | µg/l  | 1.031          | 0.131       | 0.3     | S | 1           |
| QTM159SW | Cobalt      | 0.555  | µg/l  | 0.553          | 0.169       | 0.0     | S | 1           |
| QTM159SW | Copper      | 3.513  | µg/l  | 3.209          | 0.501       | 0.6     | S | 1           |
| QTM159SW | Lead        | 1.205  | µg/l  | 1.226          | 0.158       | -0.1    | S | 1           |
| QTM159SW | Manganese   | 2.897  | µg/l  | 3.049          | 0.581       | -0.3    | S | 1           |
| QTM159SW | Vanadium    | 2.353  | µg/l  | 2.497          | 0.412       | -0.3    | S | 1           |

The letters in the z column indicate: S – Satisfactory, Q – Questionable,  
 U – Unsatisfactory, C – Consistent, I – Inconsistent, B - Blanc.

*If the analytical value looks like this, then the Assigned value is indicative only.*

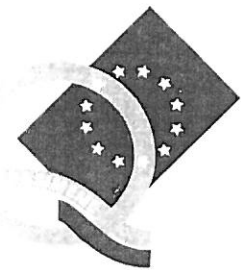

QUASIMEME Project Office  
 Wageningen UR  
 P.O. Box 47  
 6700 AA Wageningen  
 The Netherlands  
 Tel.: +31 (0) 317 486 546  
 Fax: +31 (0) 317 426 101  
 Email: quasimeme@wur.nl  
 www.quasimeme.org

05 September 2011

## Quasimeme Database

Q104D NERI  
 Dr Gert Asmund  
 Denmark

Exercise 924 – R65 Metals in Seawater: Apr – Aug 2011

| Matrix   | Determinand | Mean   | Units | Assigned Value | Total Error | Z Score | z | Total Dupl. |
|----------|-------------|--------|-------|----------------|-------------|---------|---|-------------|
| QTM163SW | Cadmium     | <0.019 | µg/l  | 0.015          | 0.004       |         | C | 1           |
| QTM163SW | Cobalt      | 0.039  | µg/l  |                |             |         | B | 1           |
| QTM163SW | Copper      | 17.70  | µg/l  | 17.36          | 2.270       | 0.1     | S | 1           |
| QTM163SW | Lead        | 0.360  | µg/l  | 0.316          | 0.045       | 1.0     | S | 1           |
| QTM163SW | Manganese   | 0.189  | µg/l  | 0.274          | 0.234       | -0.4    | S | 1           |
| QTM163SW | Nickel      | 0.243  | µg/l  | 0.289          | 0.136       | -0.3    | S | 1           |
| QTM163SW | Vanadium    | 1.520  | µg/l  | 1.591          | 0.299       | -0.2    | S | 1           |
| QTM163SW | Zinc        | 12.10  | µg/l  | 11.64          | 1.654       | 0.3     | S | 1           |
| QTM164SW | Cadmium     | 0.021  | µg/l  | 0.025          | 0.006       | -0.7    | S | 1           |
| QTM164SW | Cobalt      | 0.077  | µg/l  |                |             |         | B | 1           |
| QTM164SW | Copper      | 18.00  | µg/l  | 17.44          | 2.280       | 0.2     | S | 1           |
| QTM164SW | Lead        | 0.426  | µg/l  | 0.402          | 0.055       | 0.4     | S | 1           |
| QTM164SW | Manganese   | 0.331  | µg/l  | 0.388          | 0.249       | -0.2    | S | 1           |
| QTM164SW | Nickel      | 0.528  | µg/l  | 0.587          | 0.173       | -0.3    | S | 1           |
| QTM164SW | Vanadium    | 1.650  | µg/l  | 1.712          | 0.314       | -0.2    | S | 1           |
| QTM164SW | Zinc        | 13.20  | µg/l  | 12.63          | 1.779       | 0.3     | S | 1           |
| QTM165SW | Cadmium     | 0.210  | µg/l  | 0.189          | 0.026       | 0.8     | S | 1           |
| QTM165SW | Cobalt      | 0.462  | µg/l  | 0.437          | 0.155       | 0.2     | S | 1           |
| QTM165SW | Copper      | 8.970  | µg/l  | 8.106          | 1.113       | 0.8     | S | 1           |
| QTM165SW | Lead        | 1.150  | µg/l  | 1.059          | 0.137       | 0.7     | S | 1           |
| QTM165SW | Manganese   | 2.260  | µg/l  | 2.231          | 0.479       | 0.1     | S | 1           |
| QTM165SW | Nickel      | 3.850  | µg/l  | 3.625          | 0.553       | 0.4     | S | 1           |
| QTM165SW | Vanadium    | 2.520  | µg/l  | 2.485          | 0.411       | 0.1     | S | 1           |
| QTM165SW | Zinc        | 12.10  | µg/l  | 10.30          | 1.487       | 1.2     | S | 1           |

The letters in the z column indicate: S – Satisfactory, Q – Questionable,  
 U – Unsatisfactory, C – Consistent, I – Inconsistent, B – Blanc.  
 If the analytical value looks like this, then the Assigned value is indicative only.
